# Supplementary material for: An In Vitro Approach to Model EMT in Breast Cancer
Source: MDPI journal article supplement (doi:10.3390/ijms24097757), 2023-04-24
Supplement: s1 [file s1]

Supplement

# An In-Vitro Approach to Model EMT in Breast Cancer

Lorenz Isert <sup>1</sup>, Aditi Mehta <sup>1</sup>, Gabriele Loiudice <sup>1</sup>, Altea Oliva <sup>2</sup>, Andreas Roidl <sup>2</sup> and Olivia Merkel <sup>1,\*</sup>

<sup>1</sup> Pharmaceutical Technology and Biopharmacy, LMU Munich, Butenandtstr. 5-13, 81377 Munich, Germany

<sup>2</sup> Pharmaceutical Biotechnology, LMU Munich, Butenandtstr. 5-13, 81377 Munich, Germany

\* Correspondence: olivia.merkel@lmu.de

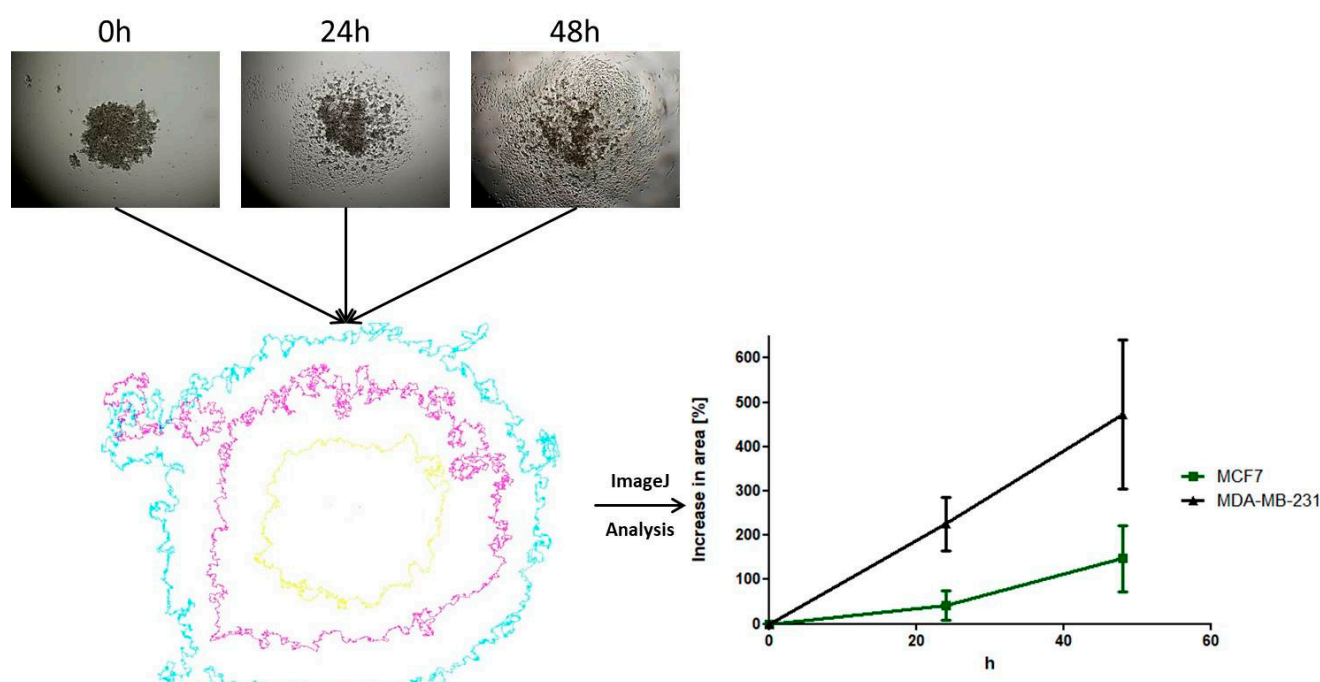

**Citation:** Isert, L.; Mehta, A.; Loiudice, G.; Oliva, A.; Roidl, A.; Merkel, O. An In Vitro Approach to Model EMT in Breast Cancer. *Int. J. Mol. Sci.* **2023**, *24*, 7757. <https://doi.org/10.3390/ijms24097757>

Academic Editor: Daniela Grimm

Received: 7 March 2023

Revised: 12 April 2023

Accepted: 18 April 2023

Published: 24 April 2023

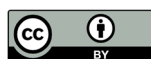

**Copyright:** © 2023 by the authors. Submitted for possible open access publication under the terms and conditions of the Creative Commons Attribution (CC BY) license (<https://creativecommons.org/licenses/by/4.0/>).

**Supplementary Figure S1.** Spheroid-based migration assay of MCF7 and MDA-MB-231 cell lines. Spheroids from a hanging-drop cell culture were transferred into a 96-well plate and its spreading was monitored after 24 h and 48 h by imaging and further analysed by Fiji image analysis software. Spreading was calculated as increase in cell area [%] in comparison to cell area at time point  $t = 0$ .

**MCF7**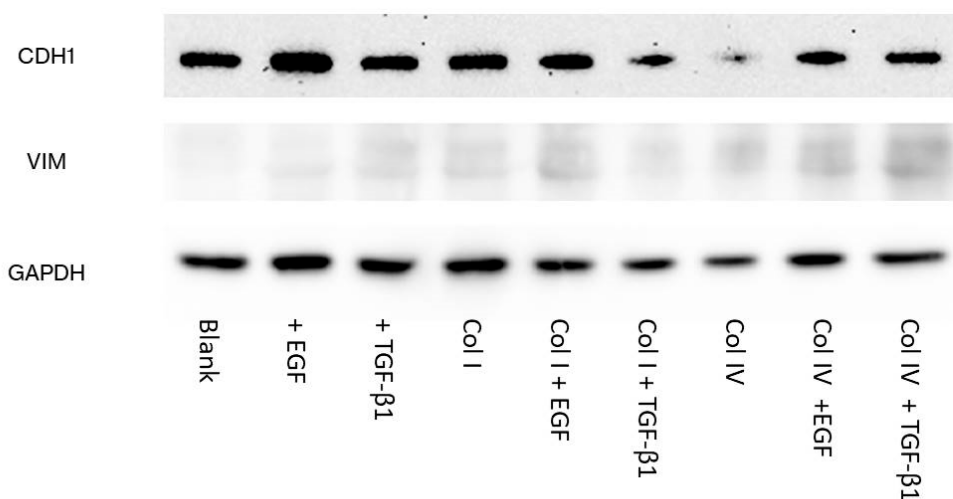**MDA-MB-468**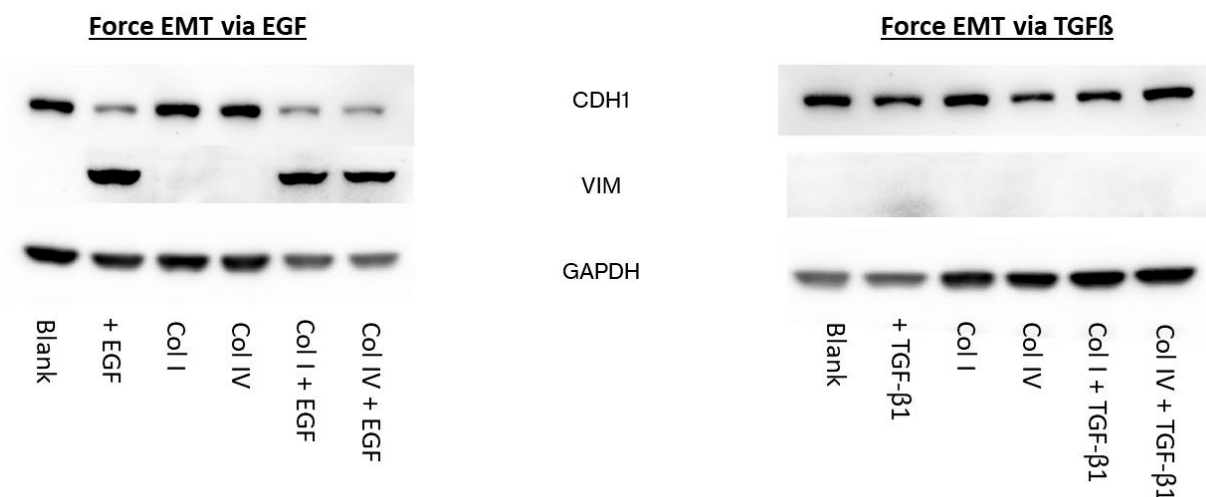

**Supplementary Figure S2.** Combinatorial treatment of growth factors and collagens. Protein levels of E-Cadherin, vimentin and GAPDH (housekeeping) were assessed via Western blotting from 30 µg of the total protein extracts of MCF7 and MDA-MB-468 cell line. Cells were subjected to multiple treatments as indicated. MCF7 cells dramatically decreased in E-cadherin protein levels upon growth on collagen IV and when grown on collagen I treated with TGF-β1. EGF stimulation induced EMT-like changes in MDA-MB-468.

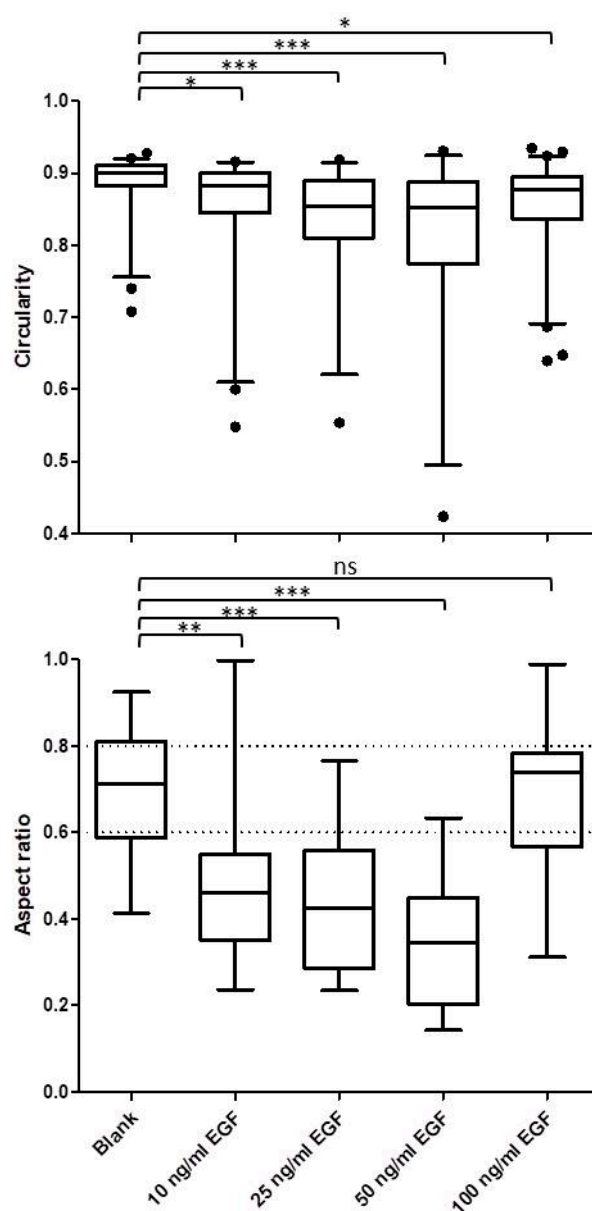

**Supplementary Figure S3.** EGF-concentration-dependant changes of morphological features in MDA-MB-468. Confocal image analysis of fixed samples treated for 72 h. Cells were treated with increasing concentration of EGF reaching from 0 ng/ml (Blank) to 100 ng/ml. Nuclear circularity  $C_N$  (upper panel) and cellular aspect ratio  $A_R$  (lower panel) were calculated using the Fiji software. Data is presented as Whiskers plot with 10-90 percentiles. One-way ANOVA with Dunnett's Multiple Comparison Test was performed in GraphPad Prism software to calculate p-values at 95% confidence interval. Morphological features gradually decreased in a concentration-dependent manner.

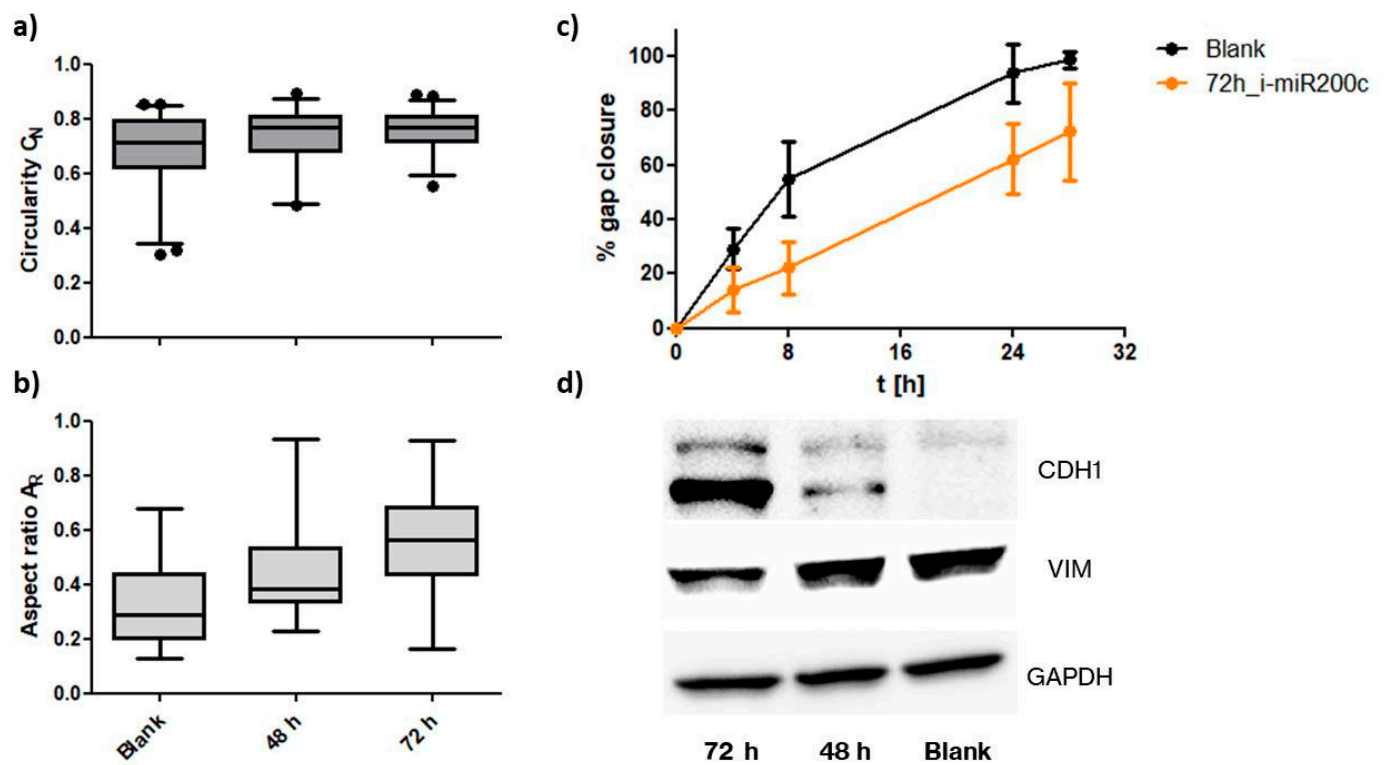

**Supplementary Figure S4.** miR200c induction in a modified MDA-MB-231 cell line after 48/72 h. Morphological analysis from 63x confocal images of nuclei (**a**) ( $n > 80$ ) and cytoskeleton (**b**) ( $n > 20$ ); (**c**) Ibidi® migration assay of untreated/blank cells (black line) and cells induced for 72 h (orange line); (**d**) Protein levels of E-Cadherin (CDH1) and Vimentin (VIM) depending on miRNA induction time
